# Supplementary material for: Development of a high-performance asymmetrical supercapacitor based on conductive polythiophene and waste tissue paper-derived porous carbon
Source: Royal Society of Chemistry journal article supplement (doi:10.1039/d4se00410h), 2024-01-01
Supplement: d4se00410h1.pdf [file d4se00410h1.pdf]

## Supplementary Information

### **Development of high-performance asymmetrical supercapacitor based on conductive polythiophene and waste tissue paper derived porous carbon**

Prashant Dubey<sup>a</sup>, Rekha Yadav<sup>a</sup>, Priyanka H. Maheshwari<sup>a</sup>, R. K. Seth<sup>a</sup>, and Shashank Sundriyal<sup>a,b\*</sup>

<sup>a</sup>Advanced Carbon Products and Metrology Department, CSIR-National Physical Laboratory (CSIR-NPL), New Delhi 110012, India;

<sup>b</sup>Regional Center of Advanced Technologies and Materials, The Czech Advanced Technology and Research Institute (CATRIN), Palacký University Olomouc, Šlechtitelů 27, 779 00 Olomouc, Czech Republic

\*Correspondence: [sundriyal.s.1991@ieee.org](mailto:sundriyal.s.1991@ieee.org) (Dr. Shashank Sundriyal)

#### **Equations for electrochemical calculations:**

##### **For three-electrode system:**

From CV curves, the specific capacitance can be computed using the following equation:

$$C_s = \frac{1}{ms(\Delta V)} \int I(V) dV \quad (\text{S1})$$

where ( $\int I(V) dV$ ) represents integral area of CV curve,  $\Delta V$  = total potential deviation of the voltage window (V), m = mass of active material on the electrode (g), s denotes the scan rate (mV/s) and the subscript c and a denotes cathodic and anodic region respectively.

From GCD curves, the corresponding specific capacity for the electrode was determined using the equations given below:

$$C = \frac{I \times \Delta t}{m \times \Delta V} \quad (\text{S2})$$

where  $C$  represents the specific capacitance (F/g),  $\Delta t$  is discharging time,  $I$  represent the applied current (mA),  $m$  denotes the active material mass (mg), and  $\Delta V$  represents potential difference (V).

**For two-electrode system:**

From GCD curves, specific capacitance for asymmetric supercapacitor device was determined using the equations given below:

$$C = \frac{I \times \Delta t}{m \times \Delta V} \quad (S3)$$

The energy density was determined using the equation:

$$E = \frac{CV^2}{2 \times 3.6} \quad (S4)$$

and the power density,  $P$  (W/kg) was evaluated using the equation:

$$P = \frac{3600 \times E}{\Delta t} \quad (S4)$$

where  $C$  represents the specific capacitance (F/g),  $\Delta t$  is discharging time,  $\Delta V$  represents potential difference (V),  $I$  represent the applied current (mA),  $m$  denotes the sum of active material mass on both electrode (mg),  $E$  represents energy density (Wh/kg), and  $P$  denotes power density (W/kg).

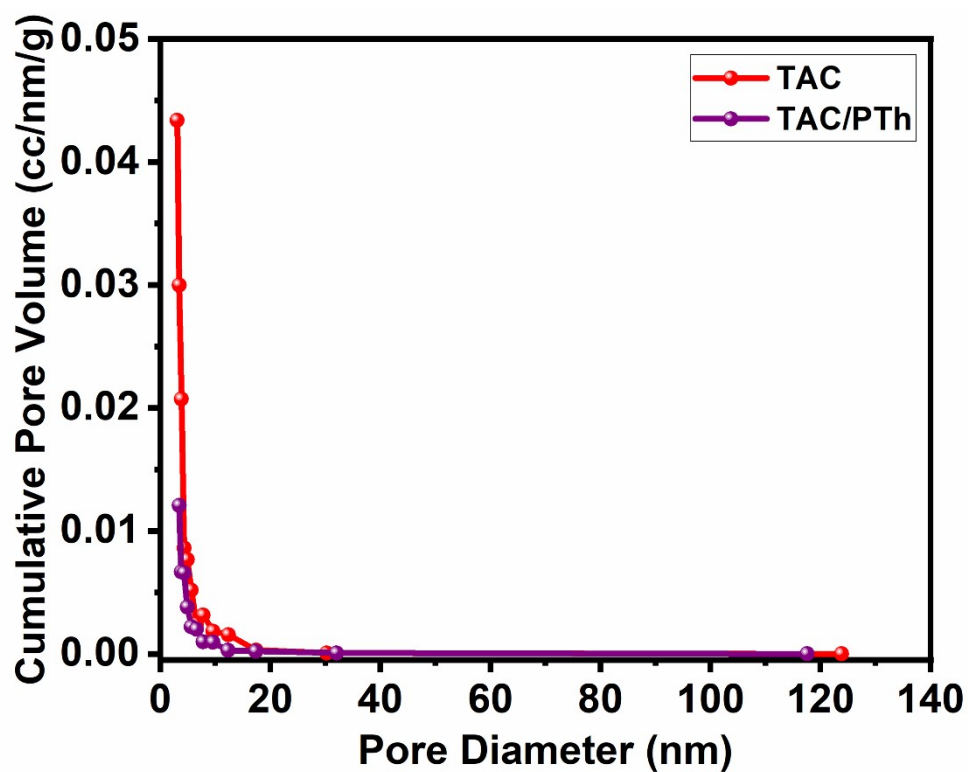

Figure S1. BJH pore size distribution plot of TAC and TAC/PTh.

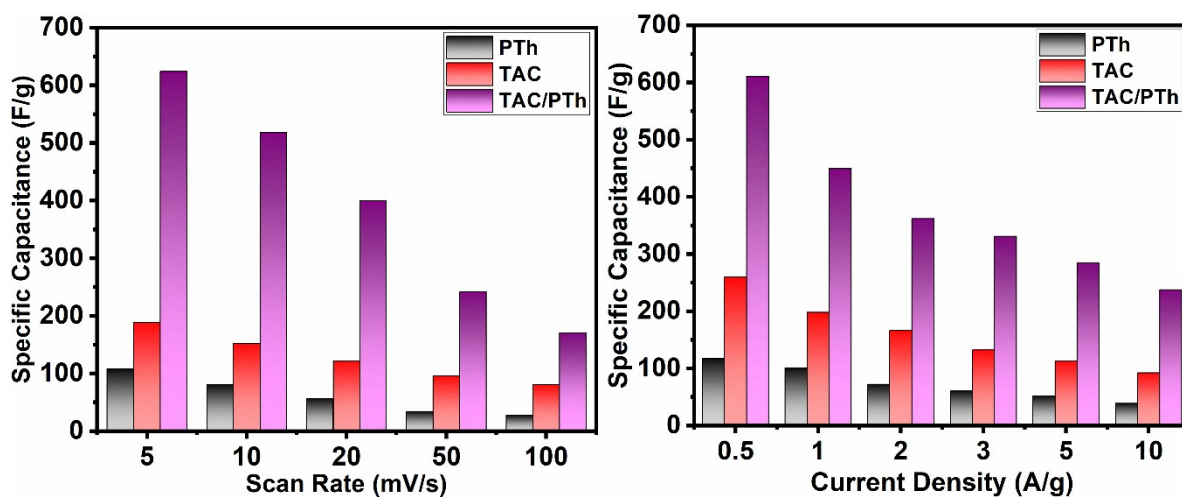

Figure S2. Comparison of variation of specific capacitance of PTh, TAC and TAC/PTh wrt. (a) current density; and (b) scan rates

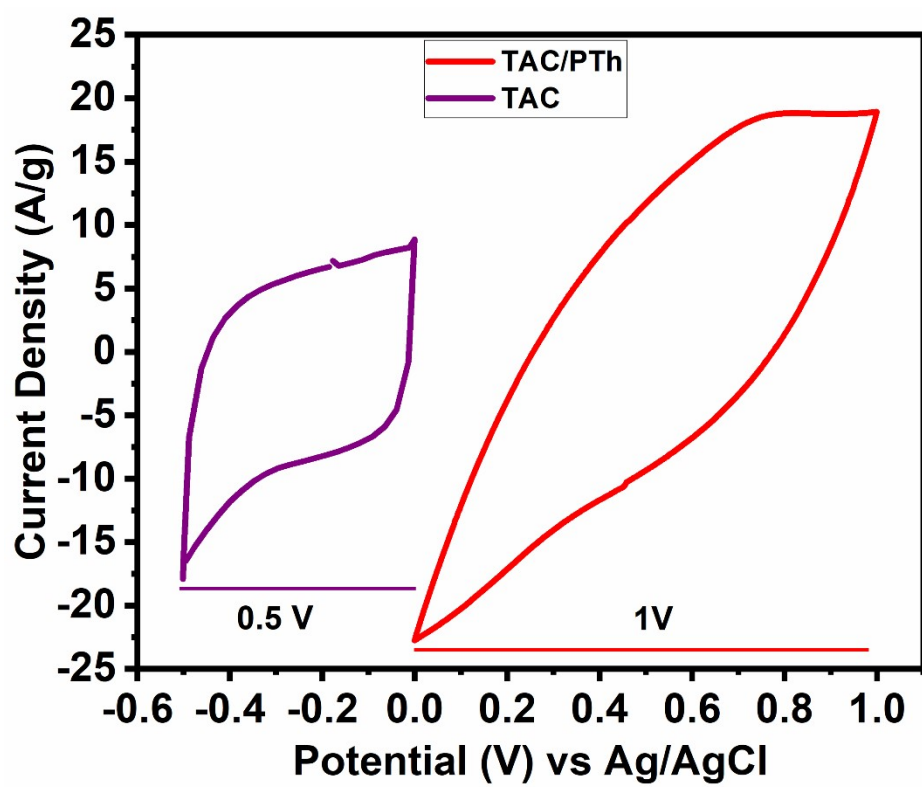

Figure S3. Combined CV of TAC and TAC/PTh
